# Supplementary material for: Inclusion of polysaccharides in perovskite thin films: from in-solution interaction to film formation and stability
Source: Royal Society of Chemistry journal article supplement (doi:10.1039/d4na01036a), 2025-01-01
Supplement: d4na01036a1.pdf [file d4na01036a1.pdf]

## Supporting information

### Inclusion of polysaccharides in perovskite thin film: from in-solution interaction to film formation and stability

Francesco Bisconti,<sup>1</sup> Antonella Giuri,<sup>1\*</sup> Nadir Vanni,<sup>1,2</sup> Sonia Carallo,<sup>1</sup> Silvia Spera,<sup>3</sup> Rosamaria Marrazzo,<sup>3</sup> Riccardo Po',<sup>3</sup> Paolo Biagini,<sup>3</sup> Barbara Paci,<sup>4</sup> Amanda Generosi,<sup>4</sup> Marco Guaragno,<sup>4</sup> Carola Esposito Corcione,<sup>5</sup> Andrea Listorti,<sup>6</sup> Silvia Colella,<sup>7</sup> Aurora Rizzo<sup>1\*</sup>

1 CNR NANOTEC – Istituto di Nanotecnologia, c/o Campus Ecotekne, Via Monteroni, 73100 Lecce, Italy;

2 Dipartimento di Matematica e Fisica “E. De Giorgi”, Università del Salento, Campus Ecotekne, via Arnesano, 73100 Lecce, Italy;

3 Research Center for Renewable Energy & Environmental, Istituto Donegani, Eni S.p.A., via Fauser 4, I-28100, Novara, Italy;

4 CNR-ISM- SpecX Lab Via del Fosso del Cavaliere 100, Roma

5 Dipartimento di Ingegneria dell’Innovazione, Università del Salento, via per Monteroni, km 1, 73100, Lecce, Italy;

6 Dipartimento di Chimica, Università di Bari, Via Orabona 4, 70126 Bari, Italy;

7 CNR NANOTEC – c/o Dipartimento di Chimica, Università di Bari, Via Orabona 4, 70126 Bari, Italy;

Corresponding author: [antonella.giuri@nanotec.cnr.it](mailto:antonella.giuri@nanotec.cnr.it) & [aurora.rizzo@nanotec.cnr.it](mailto:aurora.rizzo@nanotec.cnr.it)

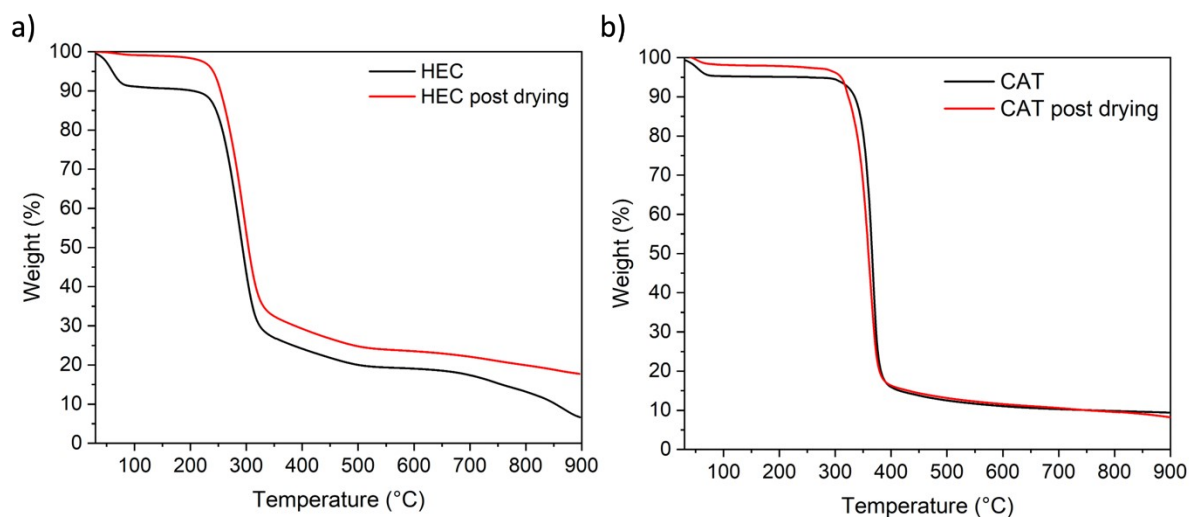

**Fig. S1. TGA analysis of polymer before and after drying process.**

**Tab. S1. TGA analysis of polymer before and after drying process.**

| Polymer                | I step              |                           | II step             |                          |
|------------------------|---------------------|---------------------------|---------------------|--------------------------|
|                        | Weight loss<br>wt % | T <sub>endset</sub><br>°C | Weight loss<br>wt % | T <sub>onset</sub><br>°C |
| HEC                    | 9.2                 | 86.3                      | 72.2                | 255.9                    |
| <i>HEC post drying</i> | 1.0                 | 81.8                      | 75.5                | 256.3                    |
| CAT                    | 4.7                 | 68.8                      | 85.3                | 350.7                    |
| <i>CAT post drying</i> | 2.2                 | 69.9                      | 87.0                | 336.8                    |

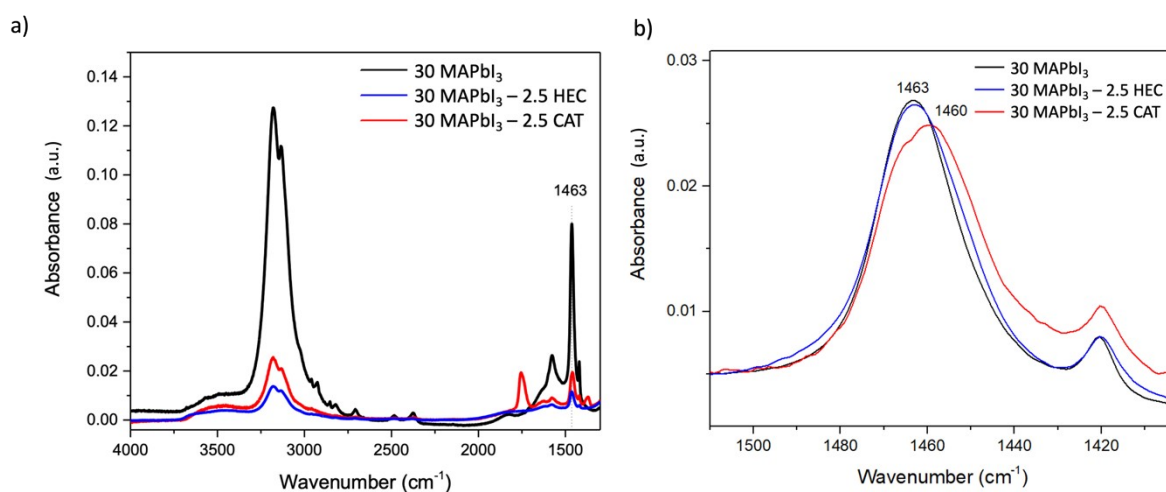

**Fig. S2. FTIR-ATR spectra of a) pristine MAPbI<sub>3</sub>, 30 MAPbI<sub>3</sub> – 2.5 HEC and 30 MAPbI<sub>3</sub> – 2.5 CAT, with b) magnification of the N-H bending (spectra normalized to -CH<sub>3</sub> bending 1422 cm<sup>-1</sup>).**

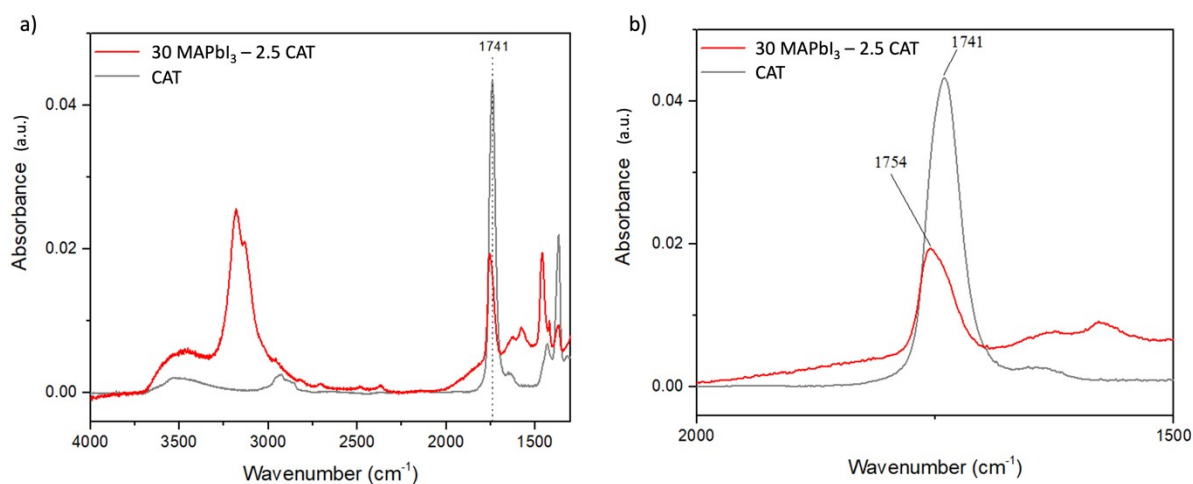

**Fig. S3. FTIR-ATR spectra of a) 30 MAPbI<sub>3</sub> – 2.5 CAT and CAT samples, along b) a magnification of the region in which fall to the C=O stretching.**
